# Supplementary material for: The Evolution, Genomic Epidemiology, and Transmission Dynamics of Tembusu Virus
Source: MDPI journal article supplement (doi:10.3390/v14061236), 2022-06-07
Supplement: s1 [file s1]

**Supplementary Table S2** Bayes Factor (BF) and Posterior Probability (PP) tests for TMUV transmission links in Asia.

| From | To    | Bayes Factory (BF>15) | Posterior Probability (PP>0.5) |
|------|-------|-----------------------|--------------------------------|
| CNGD | CNGX  | 799.1952499           | 0.981222454                    |
| CNBJ | CNGD  | 289.2384153           | 0.949778398                    |
| CNJS | CNHN  | 78.22429416           | 0.836458809                    |
| CNFJ | CNSC  | 63.31736892           | 0.805446846                    |
| CNSD | CNJS  | 34.02859108           | 0.689917408                    |
| CNFJ | TH    | 28.89645428           | 0.653905507                    |
| CNGD | CNSX  | 27.32305184           | 0.641127887                    |
| CNSD | CNZJ  | 26.6222587            | 0.635127961                    |
| CNSD | CNFJ  | 23.74286097           | 0.608214713                    |
| MY   | CNSD  | 23.03628211           | 0.60099258                     |
| CNSD | CNAH  | 19.45298753           | 0.55984494                     |
| CNJS | CNJX  | 19.12284424           | 0.55562277                     |
| CNHB | CNAH  | 18.43872231           | 0.546610536                    |
| CNSD | CNHB  | 17.37136831           | 0.531795904                    |
| CNHB | CNBJ  | 16.06412072           | 0.512277626                    |
| CNSD | CNHLJ | 15.73424902           | 0.507092505                    |
