# Supplementary material for: The Evolution, Genomic Epidemiology, and Transmission Dynamics of Tembusu Virus
Source: MDPI journal article supplement (doi:10.3390/v14061236), 2022-06-07
Supplement: s1 [file s1]

**Supplementary Table S1** Referenced TMUV strains used in phylogenetic analysis

| No. | GenBank Accession No. | Data (Year/Month/Day) | Region |
|-----|-----------------------|-----------------------|--------|
| 1   | KJ740748              | 2013.11.06            | CNAH   |
| 2   | KJ958533              | 2012.05.12            | CNAH   |
| 3   | KM102539              | 2010.03.26            | CNAH   |
| 4   | MN649267              | 2014.09.26            | CNAH   |
| 5   | MT708901              | 2019.10.15            | CNAH   |
| 6   | JF270480              | 2010.06.16            | CNBJ   |
| 7   | JQ920420              | 2012.04.10            | CNBJ   |
| 8   | JQ920421              | 2012.04.10            | CNBJ   |
| 9   | JQ920423              | 2012.04.10            | CNBJ   |
| 10  | JQ920424              | 2012.04.10            | CNBJ   |
| 11  | JQ920425              | 2012.04.10            | CNBJ   |
| 12  | JQ920426              | 2013.08.23            | CNBJ   |
| 13  | KT876991              | 2015.10.05            | CNBJ   |
| 14  | MK542820              | 2019.02.18            | CNBJ   |
| 15  | MN649265              | 2013.08.21            | CNBJ   |
| 16  | MT108702              | 2019.04.04            | CNBJ   |
| 17  | JQ928189              | 2010.08.23            | CNFJ   |
| 18  | JX196334              | 2010.07.10            | CNFJ   |
| 19  | KX977551              | 2011.02.25            | CNFJ   |
| 20  | KX977553              | 2011.05.03            | CNFJ   |
| 21  | KX977554              | 2011.11.09            | CNFJ   |
| 22  | KX977555              | 2010.12.07            | CNFJ   |
| 23  | JX549382              | 2012.01.15            | CNGD   |
| 24  | KT159713              | 2014.03.03            | CNGD   |
| 25  | KT824876              | 2015.03.15            | CNGD   |
| 26  | KX686570              | 2015.07.01            | CNGD   |
| 27  | KX686571              | 2015.09.15            | CNGD   |
| 28  | KX686572              | 2015.03.11            | CNGD   |
| 29  | KX686573              | 2014.12.08            | CNGD   |
| 30  | KX686574              | 2015.04.23            | CNGD   |
| 31  | KX686575              | 2013.11.02            | CNGD   |
| 32  | KX686576              | 2013.07.08            | CNGD   |
| 33  | KX686577              | 2013.10.18            | CNGD   |
| 34  | KX686578              | 2011.06.07            | CNGD   |
| 35  | KX686579              | 2015.09.09            | CNGD   |
| 36  | KX686580              | 2014.11.06            | CNGD   |
| 37  | KX977550              | 2011.09.21            | CNGD   |
| 38  | MT447092              | 2018.10.15            | CNGD   |
| 39  | KC990542              | 2011.02.15            | CNGX   |
| 40  | KJ700462              | 2013.05.10            | CNGX   |
| 41  | KM275940              | 2013.01.22            | CNGX   |

|    |          |            |       |
|----|----------|------------|-------|
| 42 | KM275941 | 2013.06.20 | CNGX  |
| 43 | KP861859 | 2013.07.25 | CNGX  |
| 44 | MK889501 | 2019.02.18 | CNGX  |
| 45 | MN649263 | 2015.04.26 | CNGX  |
| 46 | MN649264 | 2012.09.28 | CNGX  |
| 47 | JQ595407 | 2010.09.15 | CNHB  |
| 48 | KJ489355 | 2012.12.03 | CNHB  |
| 49 | KX452096 | 2014.01.13 | CNHB  |
| 50 | MK907880 | 2018.11.17 | CNHB  |
| 51 | MN649262 | 2010.10.30 | CNHB  |
| 52 | MN649266 | 2016.07.13 | CNHB  |
| 53 | MN966679 | 2019.09.08 | CNHB  |
| 54 | MN966680 | 2019.09.23 | CNHB  |
| 55 | JQ289550 | 2010.10.01 | CNHLJ |
| 56 | KC136210 | 2011.01.20 | CNHLJ |
| 57 | KF192951 | 2010.04.25 | CNHLJ |
| 58 | KJ782377 | 2012.06.30 | CNHLJ |
| 59 | KJ782378 | 2012.06.30 | CNHLJ |
| 60 | KJ782379 | 2012.06.30 | CNHLJ |
| 61 | KJ782380 | 2012.06.30 | CNHLJ |
| 62 | MN649261 | 2015.03.26 | CNHN  |
| 63 | AB917090 | 2012.12.01 | CNJS  |
| 64 | JF895923 | 2010.09.15 | CNJS  |
| 65 | JQ920422 | 2012.04.10 | CNJS  |
| 66 | JX273153 | 2010.08.10 | CNJS  |
| 67 | KM188953 | 2012.11.05 | CNJS  |
| 68 | KR869106 | 2014.08.20 | CNJS  |
| 69 | KY626659 | 2015.09.08 | CNJS  |
| 70 | KY810818 | 2015.09.08 | CNJS  |
| 71 | KY810819 | 2015.09.08 | CNJS  |
| 72 | KP096415 | 2014.05.15 | CNJX  |
| 73 | KM233707 | 2013.11.25 | CNSC  |
| 74 | MW143073 | 2019.08.30 | CNSC  |
| 75 | JX965381 | 2010.06.30 | CNSD  |
| 76 | KC333867 | 2012.06.12 | CNSD  |
| 77 | KC990540 | 2010.10.15 | CNSD  |
| 78 | KC990541 | 2012.01.15 | CNSD  |
| 79 | KC990543 | 2010.11.15 | CNSD  |
| 80 | KC990544 | 2010.12.15 | CNSD  |
| 81 | KC990545 | 2012.03.15 | CNSD  |
| 82 | KF557893 | 2012.10.26 | CNSD  |
| 83 | KF557894 | 2013.10.20 | CNSD  |
| 84 | KF826767 | 2012.12.15 | CNSD  |

|     |          |            |      |
|-----|----------|------------|------|
| 85  | KJ740745 | 2013.10.01 | CNSD |
| 86  | KJ740746 | 2011.11.01 | CNSD |
| 87  | KJ740747 | 2013.11.01 | CNSD |
| 88  | MH748542 | 2014.06.30 | CNSD |
| 89  | MN649260 | 2010.12.14 | CNSD |
| 90  | MT951412 | 2020.01.19 | CNSD |
| 91  | MT951413 | 2019.12.20 | CNSD |
| 92  | KP742476 | 2015.02.04 | CNSH |
| 93  | MH414568 | 2010.06.30 | CNSH |
| 94  | KM066945 | 2013.11.22 | CNSX |
| 95  | MN747003 | 2019.06.20 | CNTW |
| 96  | MW821486 | 2020.12.15 | CNTW |
| 97  | MW922032 | 2019.10.23 | CNTW |
| 98  | AB917088 | 2010.08.01 | CNZJ |
| 99  | AB917089 | 2012.12.25 | CNZJ |
| 100 | JF459991 | 2010.05.25 | CNZJ |
| 101 | JQ314464 | 2010.06.20 | CNZJ |
| 102 | JQ314465 | 2010.12.08 | CNZJ |
| 103 | KX977552 | 2010.11.29 | CNZJ |
| 104 | JX477685 | 2013.11.22 | MY   |
| 105 | KX097989 | 2012.06.30 | MY   |
| 106 | KX097990 | 2012.06.30 | MY   |
| 107 | MH414569 | 2018.05.30 | MY   |
| 108 | KF573582 | 2013.08.23 | TH   |
| 109 | KR061333 | 2013.11.15 | TH   |
| 110 | MH460536 | 2015.11.15 | TH   |

CNAH: Anhui Province, China; CNBJ: Beijing City, China; CNFJ: Fujian Province, China; CNGD: Guangdong Province, China; CNGX: Guangxi Province, China; CNHB: Hubei, Province; CNHLJ: Heilongjiang Province, China; CNJS: Jiangsu Province, China; CNJX: Jiangxi Province, China; CNSC: Sichuan Province, China; CNSD: Shandong Province, China; CNSH: Shanghai City, China; CNSX: Shanxi Province, China; CNTW: Taiwan Province, China; CNZJ: Zhejiang Province, China; MY: Malaysia; TH: Thailand.
